# Supplementary material for: The Z-scheme of 2D structured BCN and Ti MOF heterojunctions for high-efficiency photocatalytic hydrogen evolution
Source: Royal Society of Chemistry journal article supplement (doi:10.1039/d4nj02339k), 2024-01-01
Supplement: d4nj02339k1.pdf [file d4nj02339k1.pdf]

## Support Information

### The Z-scheme of 2D Structured BCN and Ti MOF Heterojunction High-Efficiency Photocatalytic Hydrogen Evolution

Cong Liu <sup>a</sup>, Liuxue Zhang <sup>\*1</sup>, Xuotong Xu <sup>a</sup>, Jiaolong Qiao <sup>a</sup>, Xu Jia <sup>\*a</sup>, Fuying Wang <sup>a</sup>,  
Xiulian Wang <sup>b</sup>

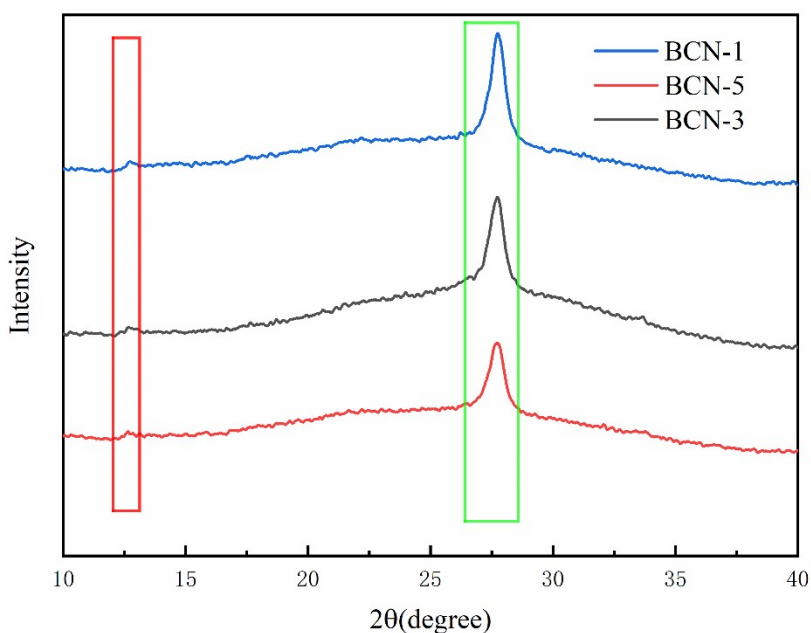

Fig. S1 XRD patterns of BCN-1, BCN-3 and BCN-5

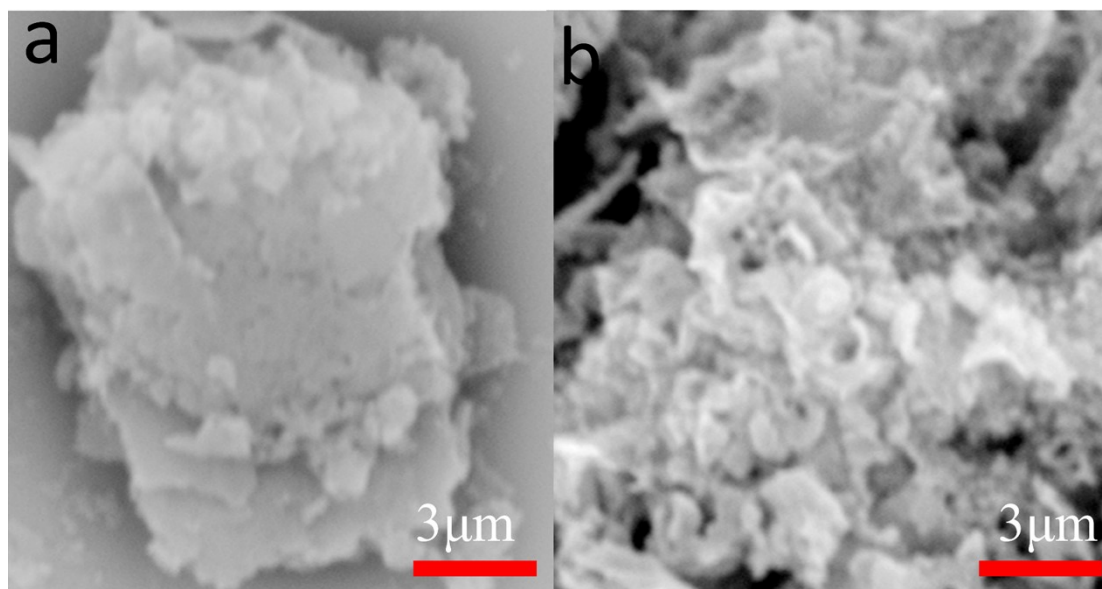

Fig S2 (a) SEM images of GCN and (b) BCN

<sup>1</sup> Corresponding author. Email address: [zhanglx@zut.edu.cn](mailto:zhanglx@zut.edu.cn) (Liuxue Zhang); [jiax@zut.edu.cn](mailto:jiax@zut.edu.cn) (Xu Jia).  
Tel.: +86 -371-62506699; Fax: +86-371-62506095

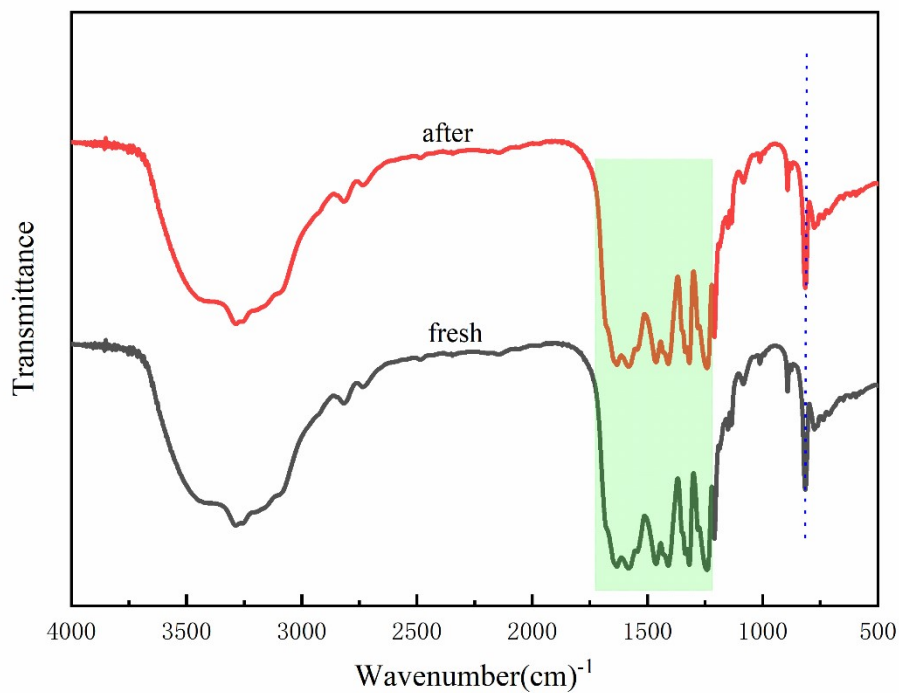

Fig S3 FTIR spectra of TBCN before and after photocatalytic test

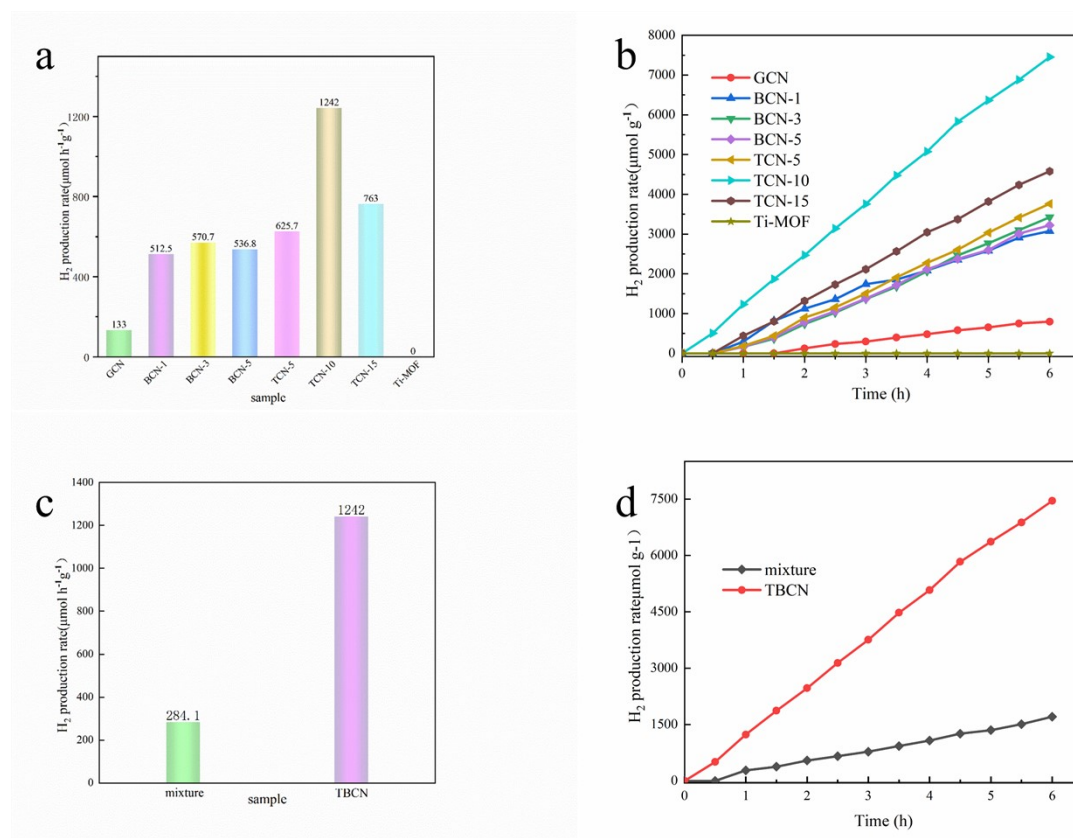

Fig S4 (a) Photocatalytic hydrogen evolution rates for all materials (b) Photocatalytic H<sub>2</sub> production of all materials (c) comparison of hydrogen evolution rates of TBCN and mixture and (d) the amount of hydrogen evolution between TBCN and the mixture.

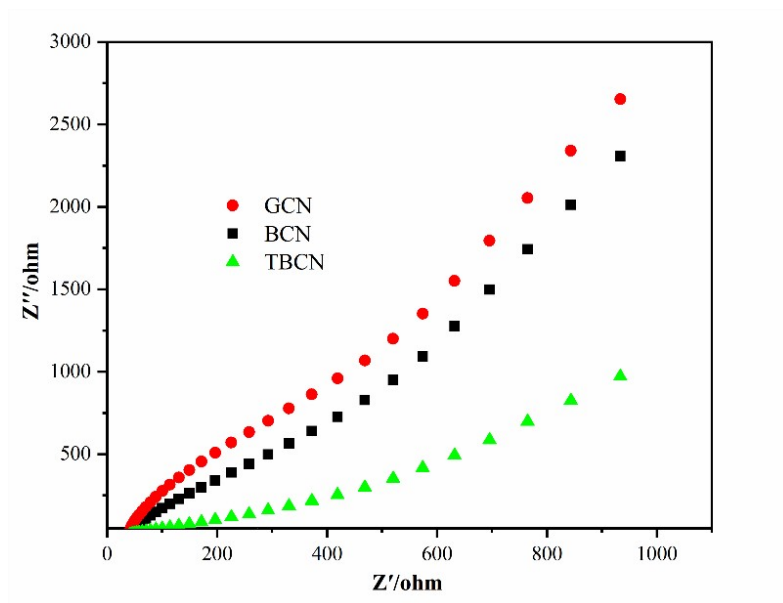

Fig S5 Electrochemical impedance spectroscopy (EIS) of the GCN BCN and TBCN

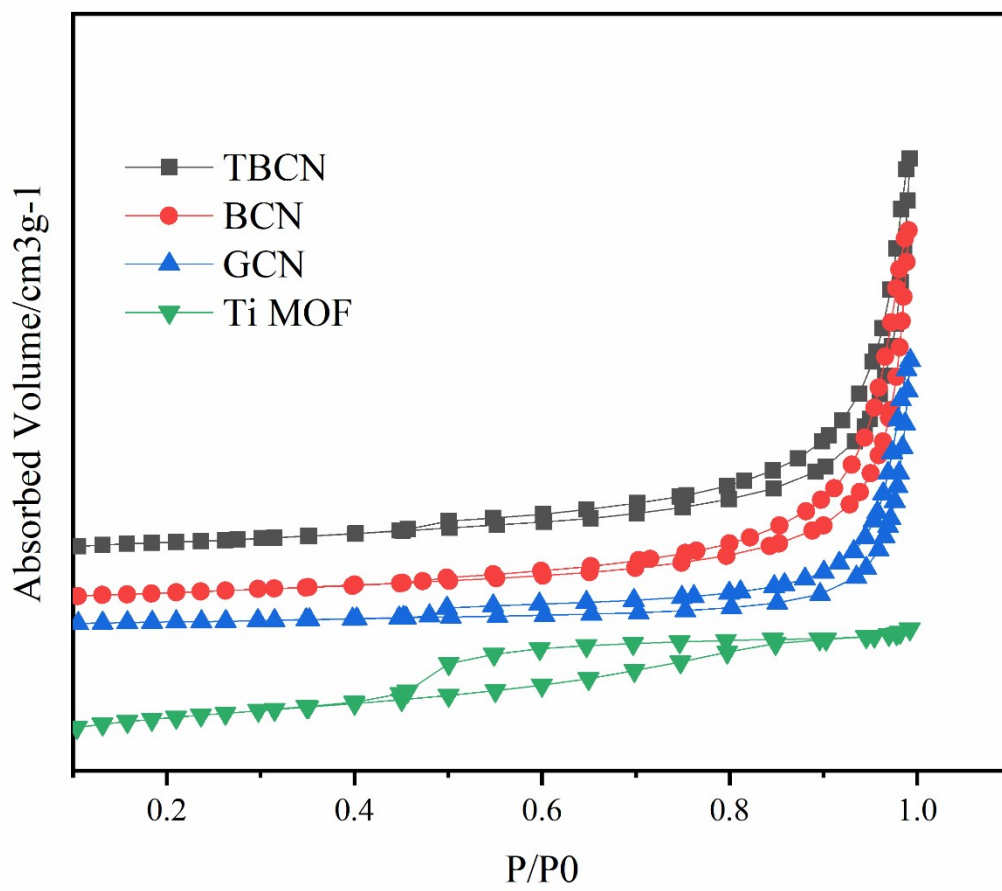

Fig S6  $N_2$  adsorption-desorption isotherms
